# Supplementary material
Source: PubMed Central journal article supplement (PMC3235331)

## Supplementary Figures

**Figure S1** Overexpression of BRMS1 in MMRU melanoma cells. MMRU cells were transiently transfected with BRMS1 plasmid and BRMS1 expression levels were examined by semi-quantitative RT-PCR.

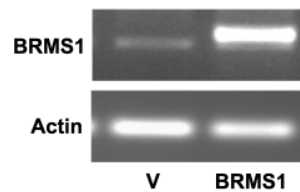

**Figure S2** Addition of IL-6 to conditioned medium rescued the tube formation inhibited by BRMS1 overexpression in SK-mel-110 cells. **(a)** Representative microscopic images for the tube formation. **(b)** The numbers of tubes formed per field were counted at 5 random fields for BRMS1-overexpressing and control groups.  $**P < 0.01$ , Student's *t*-test.

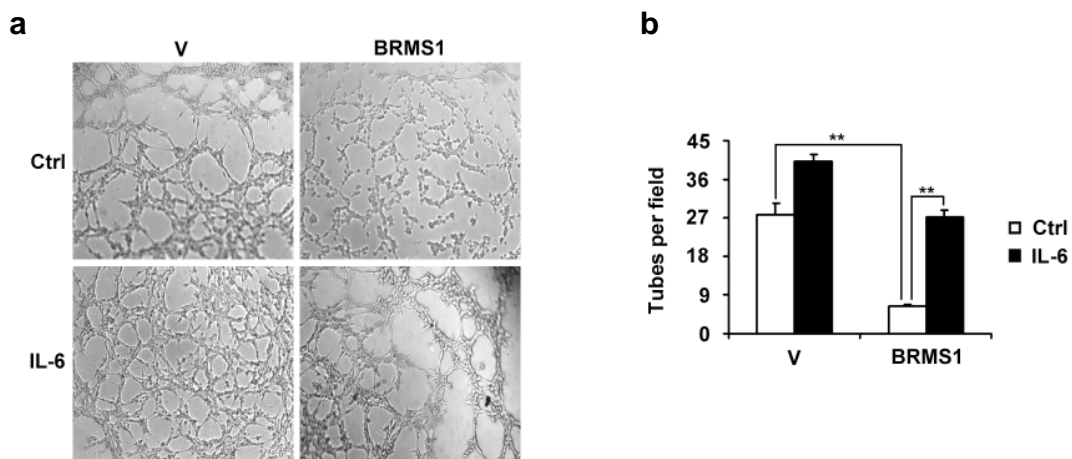

**Figure S3** BRMS1-mediated IL-6 expression in SK-mel-110 cells was dependent on p65 and p50 subunits of NF- $\kappa$ B. SK-mel-110 cells were transiently transfected with p50 or p65 siRNA for 24 hours, then transfected with vector control, Flag-BRMS1 for 48 hours. Total RNA was extracted and subjected to qRT-PCR. (a) p50 mRNA level. (b) p65 mRNA level. (c) IL-6 mRNA level. Data were presented as means  $\pm$  s.d. from three independent experiments. \* $P$ <0.05, \*\* $P$ <0.01; Student's  $t$ -test.

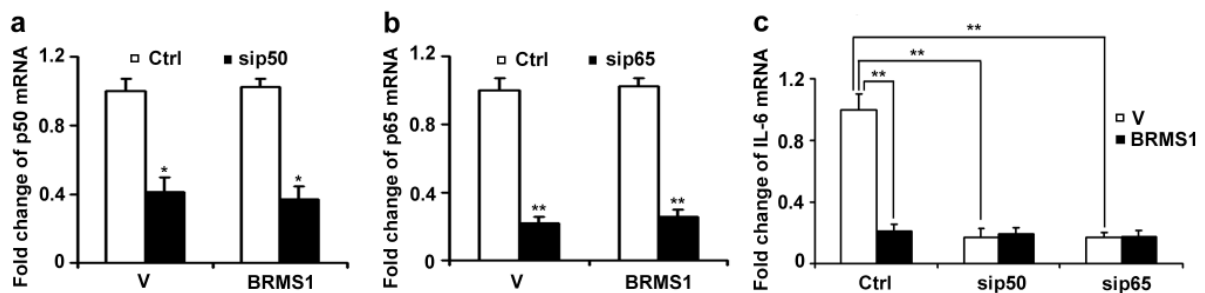

**Figure S4** BRMS1 expression was decreased in melanoma cell lines. BRMS1 mRNA levels in nine melanoma cell lines were compared with normal human epithelial melanocytes (MC) by real-time RT-PCR (n=3 for each cell line, Student's  $t$ -test). \* $P$ <0.05, \*\* $P$ <0.01.

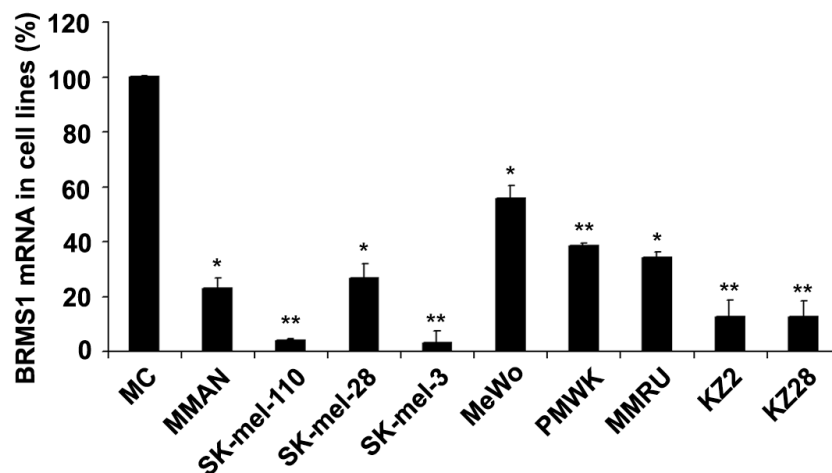

Supplement: NIHMS340763-supplement-supplement_1.pdf [file NIHMS340763-supplement-supplement_1.pdf]
